# Supplementary material for: Substrate promiscuity of polyketide synthase enables production of tsetse fly attractants 3-ethylphenol and 3-propylphenol by engineering precursor supply in yeast
Source: Springer Nature journal article supplement (doi:10.1038/s41598-020-66997-5), 2020-06-19
Supplement: MOESM1 [file 41598_2020_66997_MOESM1_ESM.pdf]

## **Supplementary Material**

### **Substrate promiscuity of polyketide synthase enables production of tsetse fly attractants 3-ethylphenol and 3-propylphenol by engineering precursor supply in yeast**

Julia Hitschler<sup>1</sup>, Martin Grininger<sup>2</sup> and Eckhard Boles<sup>1\*</sup>

<sup>1</sup>Institute of Molecular Biosciences, Faculty of Biological Sciences, Goethe University Frankfurt, Max-von-Laue Straße 9, 60438 Frankfurt am Main, Germany

<sup>2</sup>Institute of Organic Chemistry and Chemical Biology, Buchmann Institute for Molecular Life Sciences, Cluster of Excellence „Macromolecular Complexes“, Goethe University Frankfurt, Max-von-Laue-Str. 15, 60438 Frankfurt am Main, Germany

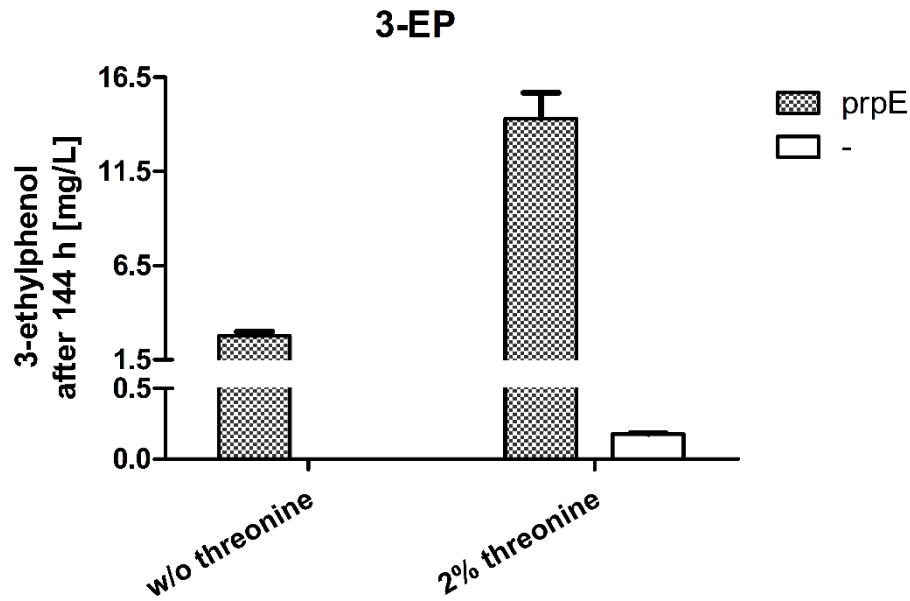

Figure S1. Influence of overexpression of a propionyl-CoA synthetase on 3-ethylphenol formation with and without supplementation of external threonine. Yeast strain CEN.PK2-1C with the  $\Delta cit2\Delta cit3$  double deletion expressing the 3-methylphenol pathway ( $P_{popl}MSAS$ ,  $optnpgA$  and  $optpatG^{14}$ ) and with or without the propionyl-CoA synthase  $optprpE$  (strains JHY185 and JHY197, respectively), were inoculated at an OD of 5 and cultivated for 144 h in  $KP_i$  buffered YPD medium (pH 6.5) with or without supplementation of 2 % threonine. Culture supernatants were analysed via HPLC for 3-alkylphenol production. Error bars represent standard deviations of biological duplicates. The y-axis was truncated to visualize also small values.

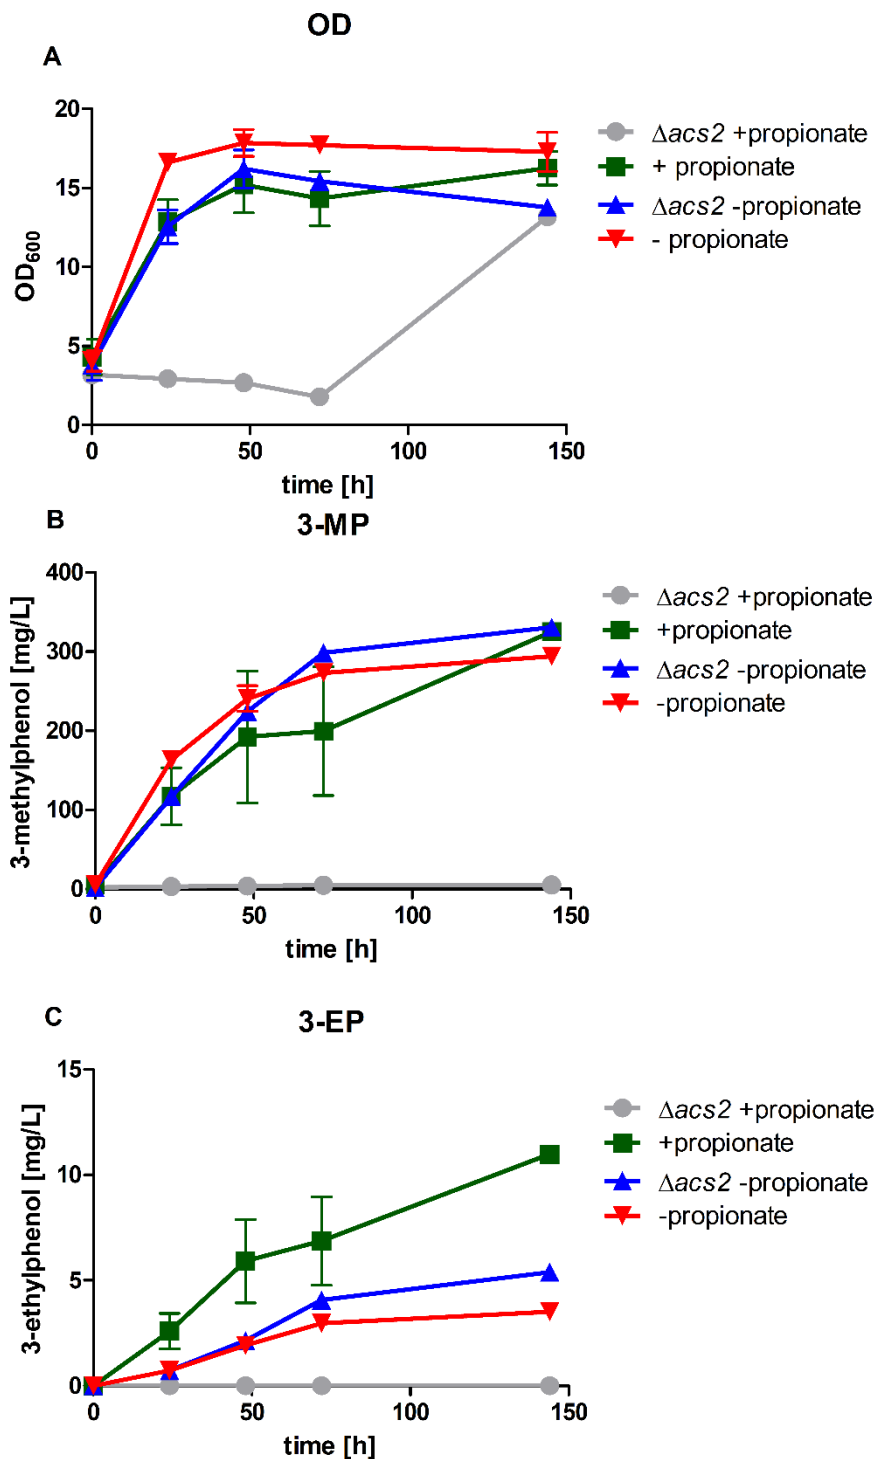

Figure S2. Influence of *acs2* deletion on growth (A), 3-methylphenol (B) and 3-ethylphenol (C) formation with or without supplementation of external propionate. Yeast strains CEN.PK2-1C expressing the 3-methylphenol pathway (*P<sub>popl</sub>MSAS*, *opt<sub>1</sub>nggA* and *opt<sub>1</sub>patG*; Hitschler and Boles, 2019), the propionyl-CoA synthase *opt<sub>1</sub>prpE*,  $\Delta$ *cit2* $\Delta$ *cit3* double deletion and with or without  $\Delta$ *acs2* were inoculated at an OD of 3.5 and cultivated for 144 h in KPi buffered YPD medium (pH 6.5) optionally supplemented with 10 mM propionate. Culture supernatants were analysed via HPLC for 3-alkylphenol production. Error bars represent standard deviations of biological duplicates.

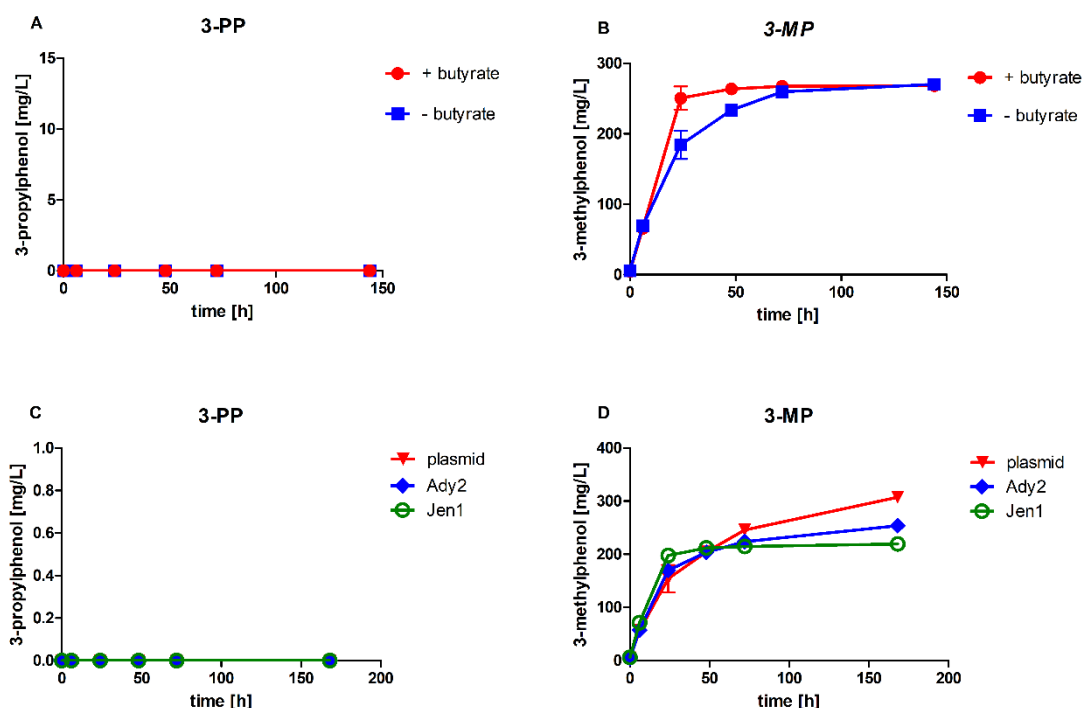

**Figure S3.** 3-alkylphenol production in different yeast strains with or without butyrate supplementation. 3-propylphenol (A) and 3-methylphenol (B) production of CEN.PK2-1C expressing the 3-methylphenol pathway ( $P_{pop1}MSAS$ ,  $optnpgA$  and  $optpatG$ ; strain JHY162; Hitschler and Boles, 2019) with or without butyrate supplementation. 3-propylphenol (C) and 3-methylphenol (D) production of strain JHY211 ( $\Delta pox1$ ) and expressing monocarboxylic acid transporters *JEN1* or *ADY2* from multi-copy plasmids pRS72N\_*JEN1* or pRS72N\_*ADY2* (empty plasmid pRS72N as control) in the presence of 10 mM butyrate. High-OD fermentations (starting OD = 4-5) were performed in biological duplicates at 30°C in KP<sub>i</sub> buffered YPD medium (pH 6.5) supplemented with (10 mM) or without butyrate. Culture supernatants were analysed via HPLC for 3-alkylphenol concentrations. Error bars represent standard deviations.

**Table S1.** Primers for plasmid or strain construction used in the present work

| Primer name                    | 5'-3' sequence                                    | Application                                                                                           |
|--------------------------------|---------------------------------------------------|-------------------------------------------------------------------------------------------------------|
| <b>Deletion of <i>CIT2</i></b> |                                                   |                                                                                                       |
| ABP047_ProCIT2_fw              | CATTTATCCGGTGGTCATCG                              | amplification of <i>CIT2</i> , forward                                                                |
| ABP048_terCIT2_rev             | GCTAGCCAAGGCAGTAAGG                               | amplification of <i>CIT2</i> , reverse                                                                |
| ABP049_CIT2_rev                | GCTTTCCAAGGCAGTTACAG                              | sequencing of <i>CIT2</i> , reverse                                                                   |
| ABP054_CIT2_Del40_Oligo        | CTCAAACTTTTTGTTTTAATAA<br>TACTAGTAACAAGAAAATTGGAT | Donor-DNA for deletion of <i>CIT2</i> binding in <i>CIT2p</i> with overhang to <i>CIT2t</i> , forward |

|                                  |                                                                                               |                                                                                                       |
|----------------------------------|-----------------------------------------------------------------------------------------------|-------------------------------------------------------------------------------------------------------|
|                                  | TACATCCTACTTTTACACCCCTC<br>TGCATATTTTT                                                        |                                                                                                       |
| ABP055_CIT2_Del40_<br>Oligo_Comp | AAAAATATGCAGAGGGGTGTAA<br>AAGTAGGATGTAATCCAATTTTC<br>TTGTTACTAGTATTATTAACA<br>AAAAGTTTTGAG    | Donor-DNA for deletion of <i>CIT2</i> binding in <i>CIT2t</i> with overhang to <i>CIT2p</i> , reverse |
| <b>Cloning of pJHV54</b>         |                                                                                               |                                                                                                       |
| MGP126_CrCASseq.fw               | GGGAAACGCCTGGTATC                                                                             | sequencing of gRNA, forward                                                                           |
| WGP243_S-Cas9-1_Rv               | TCTTCTGAAGTAGTCTTCC                                                                           | amplification of pRCC, reverse                                                                        |
| WGP245_S-Cas9-<br>3_Fw           | GGCTATTGTTGACTTGTTG                                                                           | amplification of pRCC, forward                                                                        |
| JHP233_gRNA_CIT3_f               | cttctgcatatatgtgcccgTTTAGAGC<br>TAGAAATAGCAAGTTAAAATAAG<br>G                                  | amplification of pRCC with gRNA for <i>CIT3</i> , forward                                             |
| JHP234_gRNA_CIT3_r               | cggcgcacatatatgcagaagGATCATT<br>TATCTTTCCTGCGGAGA                                             | amplification of pRCC with gRNA for <i>CIT3</i> , reverse                                             |
| <b>Deletion of <i>CIT3</i></b>   |                                                                                               |                                                                                                       |
| JHP237_CIT3p_f                   | CCATGGTAGCGGTTCTAAAG                                                                          | amplification of <i>CIT3</i> , forward                                                                |
| JHP238_CIT3t_r                   | TTTGTAACGGCCCGAGG                                                                             | amplification of <i>CIT3</i> , reverse                                                                |
| JHP239_CIT3seq_f                 | GGGATTAGCGGGTCCTTTG                                                                           | sequencing of <i>CIT3</i> , forward                                                                   |
| JHP240_CIT3_del40_O<br>ligo      | AGAATTTATACATAGACGCCGC<br>TAAATAATTGAATACAAACGCAG<br>TTCCAATTTACAAGAATGCTTCG<br>TTTGCTATTACAA | Donor-DNA for deletion of <i>CIT3</i> binding in <i>CIT3p</i> with overhang to <i>CIT3t</i> , forward |
| JHP241_CIT3_del40_O<br>ligo_comp | TTGTAATAGCAAACGAAGCATT<br>CTTGTAATTGGAAGTTCGTTT<br>GTATTCAATTTAGCGGCGT<br>CTATGTATAAATTCT     | Donor-DNA for deletion of <i>CIT3</i> binding in <i>CIT3t</i> with overhang to <i>CIT3p</i> , reverse |
| <b>Cloning of pJHV19</b>         |                                                                                               |                                                                                                       |
| JHP108_CC_sfa1#2_r               | cacagtcccgcagccaaatacGATCATT<br>TATCTTTCCTGCGGAGA                                             | amplification of pRCC with gRNA for <i>SFA1</i> , reverse                                             |

|                                                                                                    |                                                                                          |                                                                                                     |
|----------------------------------------------------------------------------------------------------|------------------------------------------------------------------------------------------|-----------------------------------------------------------------------------------------------------|
| JHP107_CC_sfa1#2_f                                                                                 | gtatttgctgcgggactgtTTTTAGAG<br>CTAGAAATAGCAAGTTAAAATAA<br>GG                             | amplification of pRCC with gRNA for <i>SFA1</i> , reverse                                           |
| <b>Genomic integration of <i>TDH3p</i><sup>-Stop</sup><i>prpE-sfa1t</i> into <i>sfa1</i> locus</b> |                                                                                          |                                                                                                     |
| JHP018_ovTDH3p_r                                                                                   | <i>ttgatagatcttggtagaattcagagaaagac</i><br><i>atTTTGTTTGTTTATGTGTGTTTA</i><br><i>TTC</i> | amplification of <i>TDH3p</i> with overhang to <i>prpE</i> and pJHV1, reverse                       |
| JHP019_ovPGK1t_f                                                                                   | aacaaatcagacaagctatcgaagaataac<br>cgcgATTGAATTGAATTGAAATC<br>GATAG                       | amplification of <i>PGK1t</i> with overhang to <i>prpE</i> and pJHV1, forward                       |
| JHP058_prpE_ovTDH3p                                                                                | tttaaacacCAAGAACTTAGTTTCG<br>AATAAACACACATA                                              | amplification of <i>prpE</i> with overhang to <i>TDH3p</i> and <i>PGK1t</i> , forward               |
| JHP059_prpE_ovPGK1t                                                                                | gagaaaagaaAAAAATTGATCTATC<br>GATTCAATTCAATTC                                             | amplification of <i>prpE</i> with overhang to <i>TDH3p</i> and <i>PGK1t</i> , reverse               |
| JHP060_ovTDH3p_SacI_f                                                                              | ttaattgcggccggtaccaattcggccgag<br>ctcACAGTTTATTCCTGGCATCCA<br>CTA                        | amplification of <i>TDH3p</i> with overhang to <i>prpE</i> , forward                                |
| JHP061_ovPGK1t_BamHI_r                                                                             | agcgcgcaattaaccctactaaaggaac<br>aaggatccAAATAATATCCTTCTCG<br>AAAGC                       | amplification of <i>PGK1t</i> with overhang to <i>prpE</i> , reverse                                |
| JHP075_prpE_d->c_1r                                                                                | cgaagatagtccatagaagtAGCCAAA<br>GCAACAGCGTAAC                                             | correct deletion at 783 bp in <i>prpE</i> , reverse                                                 |
| JHP076_prpE_d->c_2f                                                                                | agacgttggtggttacgctgTTGCTTTGG<br>CTACTTCTATG                                             | correct deletion at 783 bp in <i>prpE</i> , forward                                                 |
| JHP079_TD3p_prpE_ovsfa1up_f                                                                        | ataatactacggggctagttttatttctaccac<br>aaataaaaaaaagcatctttaaACAGTT<br>TATTCCTGGCATCCAATA  | amplification of <i>prpE</i> and <i>TDH3p</i> with overhang to <i>SFA1</i> upstream region, forward |
| JHP080_prpE_ovsfa1t_r                                                                              | ttgatttcaaagtattccagaaaattgagtc<br>gcttactagtttaattaagtactcTTATTCT<br>TCGATAGCTTGTCTGATT | amplification of <i>prpE</i> and <i>TDH3p</i> with overhang to <i>SFA1t</i> , reverse               |
| vsp328_pSFA1_fw                                                                                    | GAATAAGTCCTGGTTCCAGGCA<br>AAACC                                                          | primer binding upstream of <i>SFA1</i> locus to check integration, forward                          |

|                              |                                                                                              |                                                                                                       |
|------------------------------|----------------------------------------------------------------------------------------------|-------------------------------------------------------------------------------------------------------|
| MGP146_SFA1down-rev          | GTTAGGAACAGGCGAGGTC                                                                          | primer binding downstream of <i>SFA1</i> locus to check integration, reverse                          |
| JHP021_prpEseq1              | CGCTGTTGACAGATGGAGAG                                                                         | sequencing of <i>prpE</i>                                                                             |
| JHP022_prpEseq2              | CCCAGACTGTGGTGTTTG                                                                           | sequencing of <i>prpE</i>                                                                             |
| JHP083_sfa1_seq1_f           | GTGACAACCGAAAGTCAG                                                                           | sequencing primer binding upstream of <i>SFA1</i> locus, forward                                      |
| JHP084_sfa1_seq2_r           | TTTCTTCAGGTCTAACTGATTG                                                                       | sequencing primer binding downstream of <i>SFA1</i> locus, reverse                                    |
| <b>Deletion of ACS2</b>      |                                                                                              |                                                                                                       |
| JHP288_p-HYG-t_ovACS2_f      | catatgcgtttcccggggccgaagcgttattgc<br>cgatattTTCGTACGCTGCAGGTCGAC                             | amplification of TEFp-hphNT1-CYC1t with overhang to upstream region of ACS2, forward                  |
| JHP289_p-HYG-t_ovACS2_r      | ctttaccctatcccggggcgaagaaccccgta<br>cagtgGCATAGGCCACTAGTGGATCT<br>G                          | amplification of TEFp-hphNT1-CYC1t with overhang to downstream region of ACS2, reverse                |
| Vsp333_tACS2_rev             | AACAAGGCAAATAGCGTTAACAAC<br>C                                                                | primer binding downstream of ACS2 locus to check deletion, reverse                                    |
| Vsp334_pACS2_fw              | TTTCCTGTGAGAAGTTTAAATCCACT<br>AAGG                                                           | primer binding upstream of ACS2 locus to check deletion, forward                                      |
| Vsp338_ACS2_fw               | TTGGCTGTGGCTCGTATTGGTGC                                                                      | primer binding in ACS2 locus to check deletion, forward                                               |
| MGP122_hphNT1_fw             | TCACTGGCAAACCTGTGATGG                                                                        | primer binding in <i>hphNT1</i> to check integration, forward                                         |
| <b>Deletion of POX1</b>      |                                                                                              |                                                                                                       |
| ABP017*_POX1_Del40_Oligo     | TCACAGAAAAAAGAAAATATAA<br>TAAATTAGTATTGCGATGTAGA<br>GGTTTCCTGTTTTCTTCGAAC<br>CCTCTGTTTTGCG   | Donor-DNA for deletion of <i>POX1</i> binding in <i>POX1p</i> with overhang to <i>POX1t</i> , forward |
| ABP025_POX1_Del40_Oligo_comp | CGCAAACAGAGGGTTTCGAAG<br>GAAAACAGGAAACCTCTACATC<br>GCAATACTAATTTATTATATTTT<br>CTTTTTTTCTGTGA | Donor-DNA for deletion of <i>POX1</i> binding in <i>POX1t</i> with overhang to <i>POX1p</i> , reverse |

| Assembly via part plasmids and sequencing of pJHV62 and pJHV65 |                                                                     |                                                                                                                   |
|----------------------------------------------------------------|---------------------------------------------------------------------|-------------------------------------------------------------------------------------------------------------------|
| GDP253 Rv<br>TER_ACP1 GG as 3                                  | <u>CGTCTCAGGTCGGTCTCAGGAT</u><br>TTAAATTCTGTCTGAATCTTTCAA<br>CTTC   | amplification of <i>Ter</i> with overhangs for Golden Gate part 3, reverse                                        |
| GDP261 Fw tdTER GG<br>as 3                                     | <u>CGTCTCGTCGGTCTCATATGAT</u><br>TGTTAAGCCAATGGTTAGAAAC<br>AAC      | amplification of <i>Ter</i> with overhangs for Golden Gate part 3, forward                                        |
| GDP255 Rv<br>Crt_mtMDH GG as 3                                 | <u>CGTCTCAGGTCGGTCTCAGGAT</u><br>TTATCTGTTCTTGAAACCTTCAA<br>TC      | amplification of <i>Crt</i> with overhangs for Golden Gate part 3, reverse                                        |
| GDP263 Fw Crt GG as<br>3                                       | <u>CGTCTCGTCGGTCTCATATGGA</u><br>ATTGAACAACGTCATC                   | amplification of <i>Crt</i> with overhangs for Golden Gate part 3, forward                                        |
| GDP259 Rv<br>ERG10_mtNC GG as 3                                | <u>CGTCTCAGGTCGGTCTCAGGAT</u><br>TTAAATCTTTTCAATGACAATAG<br>AGGAAGC | amplification of <i>ERG10</i> with overhangs for Golden Gate part 3, reverse                                      |
| GDP262 Fw ERG10 GG<br>as 3                                     | <u>CGTCTCGTCGGTCTCATATGTC</u><br>TCAAACGTTTACATTG                   | amplification of <i>ERG10</i> with overhangs for Golden Gate part 3, forward                                      |
| GDP265 Rv Hbd GG as<br>3 part 1                                | CTGGGTTGAAGAAGTGCATACC<br>ATAACCTTATCTGGCCTCTTAG<br>TAGCAGAAG       | amplification of <i>Hbd</i> part 1 without <i>Bsal</i> cutsite and with overhangs for Golden Gate part 3, reverse |
| GDP266 Fw Hbd GG as<br>3 part 2                                | TCTGCTACTAAGAGGCCAGATA<br>AGGTTATTGGTATGCACTTCTTC<br>AAC            | amplification of <i>Hbd</i> part 2 without <i>Bsal</i> cutsite and with overhangs for Golden Gate part 3, forward |
| GDP267 Rv Hbd GG as<br>3 part 2                                | <u>CGTCTCAGGTCGGTCTCAGGAT</u><br>TACTTAGAGTAATCGTAGAAAC<br>CC       | amplification of <i>Hbd</i> part 2 without <i>Bsal</i> cutsite and with overhangs for Golden Gate part 3, reverse |
| GDP285 Fw Hbd GG as<br>3 part 1                                | CTGATTCTGTGGATAACCGTAG<br>TCGGTCTCATATGAAGAAGGTT<br>TGTGTTATTG      | amplification of <i>Hbd</i> part 1 without <i>Bsal</i> cutsite and with overhangs for Golden Gate part 3, forward |
| hdp073                                                         | GGTTGCATCACTCCATTG                                                  | sequencing primer binding in <i>TDH3p</i> , reverse                                                               |
| Hdp446                                                         | TCCTTTACGCTAAAATAATAGTT<br>TATTT                                    | sequencing primer binding in <i>PGK1t</i> , forward                                                               |



|                      |                                                            |                                                      |
|----------------------|------------------------------------------------------------|------------------------------------------------------|
| JTP302               | AAGGCATTA <sup>AAA</sup> AGAGGAGCG                         | sequencing primer binding in <i>PGK1t</i> , reverse  |
| SZ069seq1EcPPC_for   | GTTATCCCCTGATTCTGTG                                        | primer binding in SiHV110 backone, forward           |
| vsp84_Hbd_ovpPGK1_fw | TCTACTTTTTACAACAAATATAA<br>AACAATGAAGAAGGTTTGTGTT<br>ATTGG | sequencing primer binding in <i>Hbd</i> , forward    |
| vsp156_seq3_tVMA16   | CATACACATGTATCTCAGATATC<br>TC                              | sequencing primer binding in <i>VMA16t</i> , reverse |
| Vsp157_seq4_ERG10    | TTTCGTTGTGCGAACTTACC                                       | sequencing primer binding in <i>ERG10</i> , reverse  |
| Vsp160_seq7_hbd      | TATTGCTATTGGTAAGGATCC                                      | sequencing primer binding in <i>Hbd</i> , forward    |
| Vsp162_seq9_crt      | CACCGAAACCTGGGG                                            | sequencing primer binding in <i>Crt</i> , reverse    |
| vsp313_seq55_tdTer   | CCGTCTTGAAGCCATTCGG                                        | sequencing primer binding in <i>Ter</i> , forward    |
| vsp314_seq56_tdTer   | TTACAGACACGACTTCTTGGC                                      | sequencing primer binding in <i>Ter</i> , forward    |
| vsp315_seq57_pTDH3   | CAACTACAGAGAACAGGGGC                                       | sequencing primer binding in <i>TDH3p</i> , forward  |

Table S2. Genes used in the study with their source organism and sequence. Sequences codon-optimized (opt) for *S. cerevisiae* are indicated by prefixes in superscript.

| Gene                 | Sequence                                                                                                                                                                                                                                                                                                                                                                                                                                                                                                                                                                                                                                                                                                                                                                                                                                                  | Source organism            |
|----------------------|-----------------------------------------------------------------------------------------------------------------------------------------------------------------------------------------------------------------------------------------------------------------------------------------------------------------------------------------------------------------------------------------------------------------------------------------------------------------------------------------------------------------------------------------------------------------------------------------------------------------------------------------------------------------------------------------------------------------------------------------------------------------------------------------------------------------------------------------------------------|----------------------------|
| <sup>Ppop</sup> MSAS | ATGCACTCTGCTGCTACTTCTACTTACCCATCTGGTAAGACTTC<br>TCCAGCTCCAGTTGGTACTCCAGGTAAGTACTCTGAATAC<br>GAATTCTCTAACGACGTTGCTGTTGTTGGTATGGCTTGTAGAG<br>TTGCTGGTGGTAACCACAACCCAGAATTGTTGTGGCAATCTTT<br>GTTGTCTCAAAGTCTGCTATGGGTGAAATCCCACCAATGAGA<br>TGGGAACCATACTACAGAAGAGACGCTAGAAACGAAAAGTTCT<br>TGAAGAACA <sup>ACT</sup> ACTTCTAGAGGTTACTTCTTGGACAGATTGGA<br>AGACTTCGACTGTCAATTCTTCGGTATCTCTCCAAAGGAAGCT<br>GAACAAATGGACCCACAACAAGAGTTTCTTTGGAAGTTGCTT<br>CTGAAGCTTTGGAAGACGCTGGTATCCCAGCTAAGTCTTTGTC<br>TGGTCTGACACTGCTGTTTTCTGGGGTGTAACTCTGACGAC<br>TACTCTAAGTTGGTTTTGGAAGACTTGCCAAACGTTGAAGCTT<br>GGATGGGTATCGGTA <sup>CT</sup> GCTTACTGTGGTGTCCAAACAGAAT<br>CTCTTACCACTTGA <sup>ACT</sup> TGATGGGTCCATCTACTGCTGTTGAC<br>GCTGCTTGTGCTTCTTCTTTGGTTGCTATCCACCACGGTGTTC<br>AAGCTATCAGATTGGGTGAATCTAAGTTGCTATCGTTGGTGG<br>TGTTAACGCTTTGTGTGGTCCAGGTTTACTAGAGTTTGGAC | <i>Penicillium patulum</i> |

AAGGCTGGTGCTATCTCTTCTGACGGTCTTGTAAGTCTTTTCG  
ACGACGACGCTCACGGTTACGCTAGAGGTGAAGGTGCTGGTG  
CTTTGGTTTTGAAGTCTTTGCACAGAGCTTTGTTGGACCACGA  
CAACGTTTTGGCTGTTATCAAGGGTCTGCTGTTTGTCAAGAC  
GGTAAGACTAACGGTATCATGGCTCCAACTCTGTTGCTCAAC  
AATTGGCTGCTAACAACGCTTTGTCTGCTGCTAACATCGACCC  
ACACACTGTTAGATACGTTGAAGCTCACGCTACTTCTACTCCAT  
TGGGTGACCCAACCTGAAATCTCTGCTATCGCTTCTGTTTACGG  
TGCTGACAGACCAGCTGACGACCCATGTTACATCGGTTCTATC  
AAGCCAAACATCGGTCACCTTGAAGCTGGTGCTGGTGTTATGG  
GTTTCATCAAGGCTGTTTTGGCTATCCAAAAGGGTGTGTTTACC  
ACCACAAGCTAACTTGACTAAGTTGAACTCTAGAATCGACTGG  
AAGACTGCTGGTGTTAAGGTTGTTCAAGAAGCTACTCCATGGC  
CAGAATCTGACCCAATCAGAAGAGCTGGTGTTTGTCTTACGG  
TTACGGTGGTACTGTTTCTCACGCTGTTATCGAAGAATTCTCTC  
CAATCTTGCAACCAGACCCATTGGGTAACGGTGCTGTTTCTGG  
TCCAGGTTTGTGTTGTTGTCTGGTCCACAAGAAAAGAGATTG  
GCTTTGCAAGCTAAGACTTTGAGAGACTGGATGACTGCTGAAG  
GTAAGGACCACAACCTGTCTGACATCTTGACTACTTTGGCTACT  
AGAAGAGACCACCAGACTACAGAGCTGCTTTGGTTGTTGACG  
ACTACAGAGACGCTGAACAAGTTTTGCAATCTTTGGCTAACGG  
TGTTGACCACACTTTCACTACTCAATCTAGAGTTTTGGGTTCTG  
ACATCTCTAAGGACGTTGTTTGGGTTTTCTCTGGTCACGGTGC  
TCAATGGCCAGACATGGGTAAGCAATTGATCCACAACCCAGTT  
TTCTTCGCTGCTATCCAACCTTGGACGAATTGATCCAAGCTG  
AAATCGGTTTGTCTCCAATCGAATTGTTGAGAACTGGTGACTTC  
GAATCTTCTGACAGAGTTCAAATCTTGACTTACGTTATGCAAAT  
CGGTTTGTCTGCTTTGTTGCAATCTAACGGTATCACTCCACAA  
GCTGTTATCGGTCACTCTGTTGGTGAATCGCTGCTTCCGTTG  
TTGCTGGTGCTTTGTCTCCAGCTGAAGGTGCTTTGATCGTTAC  
TAGAAGAGCTTTGTTGTACAGACAAGTTATGGGTAAGGGTGGT  
ATGATCTTGGTTAACTTGCCATCTGCTGAACTGAAGAAATCTT  
GGGTTCTAGATCTGACTTGGTTGTTGCTATCGACTCTTCTCCAT  
CTTCTTGTGTTGTTGCTGGTGACAAGGAATTGGTTGCTGAAAC  
TGCTGAAGCTTTGAAGGCTAGAGGTGTTAAGACTTTCACTGTT  
AAGTCTGACATCGCTTTCCACTCTCCAACCTTTGAACGGTTTGGT  
TGACCCATTGAGAGACGTTTTGGCTGAACTTTGTCTCCAGTTT  
CTCAAACGTTAAGTTGTACTCTACTGCTTTGGCTGACCCAAG  
AGGTCAAGACTTGAGAGACGTTGAATACTGGGCTGGTAACATG  
GTTAACAGAGTTAGATTGACTTCTGCTGTTAAGGCTGCTGTTG  
AAGACGGTTACAGATTGTTCTTGAAGTTTTCTACTCACCCAGTT  
GTTTCTCACTCTATCAACGAACTTTGATGGACGCTGGTATGG  
AAGACTTCGCTGTTATCCCAACTTTGTTGAGAAAGAAGCCAAC  
TGAAAAGCACATCTTGCACTCTATCGCTCAATTGCACTGTAGA  
GGTGCTGAAGTTAACTGGGCTGCTCAAATGCCAGGTAGATGG  
GCTACTGGTGTTCCAACTACTACTTGGATGCACAAGCCAATCT  
GGAGAAAGATCGAACTGCTCCATTGCACACTGGTTTGACTCA  
CGACGTTGAAAAGCACACTTTGTTGGGTCAAAGAATCCCAGTT  
CCAGGTACTGACACTTACGTTTACACTACTAGATTGGACAACG  
ACACTAAGCCATTCCCAGGTTCTCACCCATTGCACGGTACTGA  
AATCGTTCCAGCTGCTGGTTTGTATCAACACTTTCTTGAAGGGT  
ACTGGTGGTCAAATGTTGCAAAACGTTGTTTTGAGAGTTCCAG  
TTGCTATCAACGCTCCAAGATCTGTTCAAGTTGTTGTTCAACAA  
GACCAAGTTAAGGTTGTTTCTAGATTGATCCCATCTGAACCATC  
TCAATTGGACGACGACGCTTCTTGGGTTACTCACACTACTGCT  
TACTGGGACAGAAAGGTTGCTGGTTCTGAAGACAGAATCGACT

TCGCTGCTGTTAAGTCTAGATTGGTTACTAAGTTGGCTGACAA  
CTTCTCTATCGACTACTTGGACAAGGTTGGTGTCTGCTATG  
GGTTTCCCATGGGCTGTTACTGAACACTACAGAAACGACAAGG  
AAATGTTGGCTAGAGTTGACGTTAACCCAGCTATCTCTGGTGA  
CGCTCCATTGCCATGGGACTCTTCTTCTTGGGCTCCAGTTTTG  
GACGCTGCTACTTCTGTTGGTTCTACTATCTTCCCAACTCCAG  
CTTTGAGAATGCCAGCTCAAATCGAAAGAGTTGAAGTTTTCACT  
TCTCAAGACCCACCAAAGATCTCTTGGTTGTACGTTCAAGAAG  
CTTCTGACTCTGTTCCAACTTCTCACGTTTCTGTTGTTTCTGAA  
GCTGGTGAAGTTTTGGCTAAGTTCACTGCTATGAGATTCTCTG  
AAATCGAAGTACTCCAGGTGTTTCTGGTTCTATGGAATCTTTG  
GTTCCACCAAATCGCTTGGCCACCAGCTACTCCAGCTGAAGAAC  
CATTGTCTATCGAAACTGTTATCTTGGTTTCTCCAGACGCTACT  
ACTAGAGCTTTGTACGCTGCTTCTTGGCAACTAGAGTTAACTC  
TTTCCAATTCTTCTACTCAAGAATTCTTCTCTAACGCTTCTTC  
TTTGCCATTGGAAAAGGGTACTGTTGTTACTTACATCCCAGGT  
GAAGTTGCTTCTTGGCTGAAGTTCCAGCTGCTTCTGAATCTTT  
CACTTGGAACTTGTGGAAATTGATCAAGTTCACTGTTAACGGTT  
CTTTGCCAATCAAGTTTTCACTTTGACTGCTAACATCGGTGAA  
GGTCAAACCTCAAAGCTTTGGCTCAATCTCCATTGTACGGTTT  
GGCTAGAGTTATCGCTTCTGAACACCCAGACTTGGGTACTTTG  
ATCGACGTTGAAGAACCAGTTATCCCATTGTCTACTATGAGATA  
CATCCAAGGTGCTGACATCATCAGAATCAACGACGGTATCGCT  
AGAACTTCTAGATTCAGATCTTTGCCAAGAAACAAGTTGTTGCC  
AGCTTCTGAAGGTCCAAGATTGTTGCCAAGACCAGAAGGTACT  
TACTTGATCACTGGTGGTTTTGGGTGTTTTGGGTTTGAAGTTG  
CTGACTTCTTGGTTGAAAAGGGTGCTAGAAGATTGTTGTTGAT  
CTCTAGAAGAGCTTTGCCACCAAGAAGAACTTGGGACCAAGTT  
TCTGAAGACTTGCAACCAACTATCGCTAAGATCAGATTGTTGG  
AATCTAGAGGTGCTTCTGTTACGTTTTGCCATTGGACATCACT  
AAGCCAGACGCTGTTGAACAATTGACTACTGCTTTGGACAGAT  
TGCTTTGCCATCTGTTCAAGGTGTTGTTACGCTGCTGGTGT  
TTTGGACAACGAATTGGTTATGCAAACACTAGAGACGCTTTCA  
ACAGAGTTTTGGCTCCAAAGATCGCTGGTGCTTTGGCTTTGCA  
CGAAGTTTTCCACCAAAGTCTGTTGACTTCTTCGTTATGTTCT  
CTTCTTGTGGTAACTTGGTTGGTTTCACTGGTCAAGCTTCTTAC  
GGTTCTGGTAAACGCTTTCTTGGACACTTTGGCTACTCACAGAG  
CTAGATTGGGTGACGCTGCTGTTTCTTCCAATGGACTTCTTG  
GAGAGGTTTGGGTATGGGTGCTTCTACTGACTTCATCAACGCT  
GAATTGGAATCTAAGGGTATCACTGACGTTACTAGAGACGAAG  
CTTTGCTGCTTGGCAACACTTGGCTAAGTACGACATGGACCA  
CGGTGTTGTTTTGAGATCTAGAGCTTTGCAAGACGGTGAACCA  
ATCCCAGTTTCTATCTTGAACGACATCGCTGTTAGAAGAGTTG  
GACTGTTTCTAACACTTCTCCAGCTGCTGCTGGTTCTTCTGAC  
GCTGTTCCAACCTTCTGGTCCAGAATTGAAGGCTTACTTGGACG  
AAAAGATCAGAGGTTGTGTTGCTAAGGTTTTGCAAATGACTGC  
TGAAGACGTTGACTCTAAGGCTGCTTTGGCTGACTTGGGTGTT  
GACTCTGTTATGACTGTTACTTTGAGAAGACAATTGCAACTTAC  
TTTGAAGATCGCTGTTCCACCAACTTTGACTTGGTCTCACCCAA  
CTGTTTCTCACTTGGCTGTTGGTTCGCTGAAAAGTTGGCTAA  
GTAA

|                       |                                                                                                                                                                                                                                                                                                                                                                                                                                                                                                                                                                                                                                                                                                                                                                                                                                                                                                                                                                                                                                                                                                                                                                                                                 |                                          |
|-----------------------|-----------------------------------------------------------------------------------------------------------------------------------------------------------------------------------------------------------------------------------------------------------------------------------------------------------------------------------------------------------------------------------------------------------------------------------------------------------------------------------------------------------------------------------------------------------------------------------------------------------------------------------------------------------------------------------------------------------------------------------------------------------------------------------------------------------------------------------------------------------------------------------------------------------------------------------------------------------------------------------------------------------------------------------------------------------------------------------------------------------------------------------------------------------------------------------------------------------------|------------------------------------------|
| <p><i>optnpgA</i></p> | <p>ATGGTTCAAGACACTTCTTCTGCTTCTACTTCTCCAATCTTGAC<br/> TAGATGGTACATCGACACTAGACCATTGACTGCTTCTACTGCT<br/> GCTTTGCCATTGTTGGAACTTTGCAACCAGCTGACCAAATCT<br/> CTGTTCAAAGTACTACCACTTGAAGGACAAGCACATGTCTTT<br/> GGCTTCTAACTTGTGAAGTACTTGTTCGTTACAGAACTGTA<br/> GAATCCCATGGTCTTCTATCGTTATCTCTAGAACTCCAGACCCA<br/> CACAGAAGACCATGTTACATCCCACCATCTGGTTCTCAAGAAG<br/> ACTCTTTCAAGGACGGTTACACTGGTATCAACGTTGAATTTAAC<br/> GTTTCTCACCAAGCTTCTATGGTTGCTATCGCTGGTACTGCTTT<br/> CACTCCAACTCTGGTGGTACTCTAAGTTGAAGCCAGAAGTT<br/> GGTATCGACATCACTTGTGTTAACGAAAGACAAGGTAGAAACG<br/> GTGAAGAAAGATCTTTGGAATCTTTGAGACAATACATCGACATC<br/> TTCTCTGAAGTTTTCTCTACTGCTGAAATGGCTAACATCAGAAG<br/> ATTGGACGGTGTCTTCTTCTTCTTTGTCTGCTGACAGATTGG<br/> TTGACTACGGTTACAGATTGTTCTACACTTACTGGGCTTTGAAG<br/> GAAGCTTACATCAAGATGACTGGTGAAGCTTTGTTGGCTCCAT<br/> GGTTGAGAGAATTGGAATTCTCTAACGTTGTTGCTCCAGCTGC<br/> TGTGCTGAATCTGGTACTCTGCTGGTACTTCGGTGAACCA<br/> TACACTGGTGTAGAATACTTTGTACAAGAACTTGGTTGAAGA<br/> CGTTAGAATCGAAGTTGCTGCTTTGGGTGGTACTACTTGTTC<br/> GCTACTGCTGCTAGAGGTGGTGGTATCGGTGCTTCTTCTAGAC<br/> CAGGTGGTGGTCCAGACGGTTCTGGTATCAGATCTCAAGACC<br/> CATGGAGACCATTCAAGAAGTTGGACATCGAAAGAGACATCCA<br/> ACCATGTGCTACTGGTGTGTTGTAAGTGTGTTGTCTTAA</p> | <p><i>Aspergillus<br/>nidulans</i></p>   |
| <p><i>optpatG</i></p> | <p>ATGGCTAAGATCGACGTTACCACCCTTCTACCCACAAGCTA<br/> TGAGAGAAGCTTTGGAAAGAGCTGGTGGTGACCCATCTGGTT<br/> GGTACATCCCACCATGGACTTTGGACTTGGACAAGGAAATCTC<br/> TAGAGTTTTGAAGGTTCAAATACTATCTTGTCTGTTACTGCTC<br/> CAGGTCCAGGTATCGAAACTGACCCAGGTAAGGCTGCTGCTTT<br/> GGCTAGATTGTGAACGAAGAAGCTGCTGCTATCAGAGACGCT<br/> CACCCATTGCAATACGGTTTTCTTCGCTTCTGTTCCATCTTTGTT<br/> CGACACTGCTGCTGTTTTGGCTGAAATCGAACACGCTTTCACT<br/> AACTTGCACGCTGACGGTGTACTTTGTACACTAGATACGGTG<br/> CTGGTCACTCTTACTTGGGTGACGAAAGATTCAGACCAGTTTG<br/> GGCTGAATTGTCTAAGAGAAGAGCTGTTGTTTTCATCCACCCA<br/> ACTCACGCTGTTGACACTCAATTGATCAACTCTTGGATGCCAC<br/> AACCAATGTTGACTACCCACACGAAACTGGTAGAACTGCTAT<br/> GGACTTGTGACTAGAGGTGTTATCAGAGACTACCCAGGTTGT<br/> AAGATCATCTTGTCTCACGCTGGTGGTACTTTGCCATACTTGAT<br/> CCACAGAGCTGCTACTATGTTGCCATTCATGCCAAGAACTTG<br/> GGTATGTCTAGAGAAGAAATCGTTGAAGCTGCTAGAACTTTGT<br/> ACTTCGACACTGCTATCTCTGCTAACCCAGTTACTTTGAAGGCT<br/> TTGTTGGAATTCGCTAAGCCAGGTCACGTTTTGTTGCGTTCTG<br/> ACTTCCCAAACGCTCCAAGAGGTGCTATCACTCACTTCACTTC<br/> TTTCTTGAAGGTTACGACAACATGTCTGAAGAACTAGAAGA<br/> TTGGTTGAAAGAGAAGCTGCTTTGGAATTGTTCCCAAGATTGA<br/> GAGGTCAATCTACTAGAGCTTGTGTTGTAA</p>                                                           | <p><i>Aspergillus<br/>clavatus</i></p>   |
| <p><i>optprpE</i></p> | <p>ATGTCTTTCTCTGAATTCTACCAAAGATCTATCAACGAACCAGA<br/> AGCTTTCTGGGCTGAACAAGCTAGAAGAATCGACTGGAGACAA<br/> CCATTCACTCAAACCTTTGGACCACTCTAGACCACCATTGCTA<br/> GATGGTTCTGTGGTGGTACTACTAACTTGTGTACACACGCTGT</p>                                                                                                                                                                                                                                                                                                                                                                                                                                                                                                                                                                                                                                                                                                                                                                                                                                                                                                                                                                                                          | <p><i>Salmonella<br/>typhimurium</i></p> |

|              |                                                                                                                                                                                                                                                                                                                                                                                                                                                                                                                                                                                                                                                                                                                                                                                                                                                                                                                                                                                                                                                                                                                                                                                                                                                                                                                                                                                                                                                                                                                                                                                                                                                                                                                                                                                                                                                                                                                                                                                                                                |                                        |
|--------------|--------------------------------------------------------------------------------------------------------------------------------------------------------------------------------------------------------------------------------------------------------------------------------------------------------------------------------------------------------------------------------------------------------------------------------------------------------------------------------------------------------------------------------------------------------------------------------------------------------------------------------------------------------------------------------------------------------------------------------------------------------------------------------------------------------------------------------------------------------------------------------------------------------------------------------------------------------------------------------------------------------------------------------------------------------------------------------------------------------------------------------------------------------------------------------------------------------------------------------------------------------------------------------------------------------------------------------------------------------------------------------------------------------------------------------------------------------------------------------------------------------------------------------------------------------------------------------------------------------------------------------------------------------------------------------------------------------------------------------------------------------------------------------------------------------------------------------------------------------------------------------------------------------------------------------------------------------------------------------------------------------------------------------|----------------------------------------|
|              | <p>TGACAGATGGAGAGACAAGCAACCAGAAGCTTTGGCCTTGATC<br/> GCTGTTTCTTCTGAAACTGACGAAGAAAGAACTTTCACTTTCTC<br/> TCAATTGCACGACGAAGTTAACATCGTTGCTGCTATGTTGTTGT<br/> CTTTGGGTGTTCAAAGAGGTGACAGAGTTTTGGTTTACATGCC<br/> AATGATCGCTGAAGCTCAAATCACTTTGTTGGCTTGTGCTAGA<br/> ATCGGTGCTATCCACTCTGTTGTTTTCGGTGGTTTCGCTTCTCA<br/> CTCTGTTGCTGCTAGAATCGACGACGCTAGACCAGCTTTGATC<br/> GTTTCTGCTGACGCTGGTGCTAGAGGTGGTAAGATCTTGCCAT<br/> ACAAGAAGTTGTTGGACGACGCTATCGCTCAAGCTCAACACCA<br/> ACCAAAGCACGTTTTGTTGGTTGACAGAGTTTTGGCTAAGATG<br/> GCTTGGGTTGACGGTAGAGACTTGGACTTCGCTACTTTGAGAC<br/> AACAACACTTGGGTGCTTCTGTTCCAGTTGCTTGGTTGGAATC<br/> TAACGAAACTTCTTGTATCTTGTACACTTCTGGTACTACTGGTA<br/> AGCCAAAGGGTGTTCAAAGAGACGTTGGTGGTTACGCTGTTG<br/> CTTTGGCTACTTCTATGGACACTATCTTCGGTGGTAAGGCTGG<br/> TGGTGTTCCTTCTGTGCTTCTGACATCGGTTGGGTTGTTGGT<br/> CACTCTTACATCGTTTACGCTCCATTGTTGGCTGGTATGGCTA<br/> CTATCGTTTACGAAGGTTTGCCAACTTACCCAGACTGTGGTGT<br/> TTGGTGGAAAGATCGTTGAAAAGTACCAAGTTAACAGAATGTTT<br/> TCTGCTCCAAGTCTATCAGAGTTTTGAAGAAGTTCCCAACTG<br/> CTCAAATCAGAAACCACGACTTGTCTTCTTTGGAAGCTTTGTAC<br/> TTGGCTGGTGAACCATTGGACGAACCAACTGCTTCTTGGGTTA<br/> CTGAAACTTTGGGTGTTCCAGTTATCGACAACACTACTGGCAAAC<br/> TGAATCTGGTTGGCCAATCATGGCTTTGGCTAGAGCTTTGGAC<br/> GACAGACCATCTAGATTGGGTTCTCCAGGTGTTCCAATGTACG<br/> GTTACAACGTTCAATTGTTGAACGAAGTTACTGGTGAACCATGT<br/> GGTATCAACGAAAAGGGTATGTTGGTTATCGAAGGTCCATTGC<br/> CACCAGGTTGTATCCAAACTATCTGGGGTGACGACGCTAGATT<br/> CGTTAAGACTTACTGGTCTTTGTTCAACAGACAAGTTTACGCTA<br/> CTTTGACTGGGGTATCAGAGACGCTGAAGGTTACTACTTCAT<br/> CTTGGGTAGAACTGACGACGTTATCAACATCGCTGGTCACAGA<br/> TTGGGTACTAGAGAAATCGAAGAATCTATCTTCTTACCCAAA<br/> CGTTGCTGAAGTTGCTGTTGTTGGTATCAAGGACGCTTTGAAG<br/> GGTCAAGTTGCTGTTGCTTTCGTTATCCCAAAGCAATCTGACA<br/> CTTTGGCTGACAGAGAAGCTGCTAGAGACGAAGAAAACGCTAT<br/> CATGGCTTTGGTTGACAACCAAATCGGTCCTTCGGTAGACCA<br/> GCTCACGTTTGGTTGCTTCTCAATTGCCAAAGACTAGATCTG<br/> GTAAGATGTTGAGAAGAAGTATCCAAGCTATCTGTGAAGGTAG<br/> AGACCCAGGTGACTTACTACTATCGACGACCCAGCTTCTTTG<br/> CAACAAATCAGACAAGCTATCGAAGAATAA</p> |                                        |
| <p>ERG10</p> | <p>ATGTCTCAAACGTTTACATTGTTTCTACTGCTAGAACCCCAAT<br/> TGGTCTTTCCAAGGTTCTTTGTCCTCCAAGACCGCTGTTGAAT<br/> TGGGTGCTGTTGCTTTGAAGGGTGCTTTGGCTAAGGTTCCAGA<br/> ATTGGATGCTTCCAAGGATTTGACGAAATTATTTTCGGTAACG<br/> TTTTGTCTGCTAACTTGGGTCAAGCTCCAGCTAGACAAGTTGC<br/> TTTGGCTGCTGGTTTGTCTAACCACATCGTTGCTTCTACCGTTA<br/> ACAAGGTCTGTGCTTCCGCTATGAAGGCTATCATTTTGGGTGC<br/> TCAATCCATCAAGTGTGGTAACGCTGATGTTGTCGTTGCTGGT<br/> GGTTGTGAATCTATGACTAACGCTCCATACTACATGCCAGCTG<br/> CTAGAGCTGGTGCTAAGTTCCGGTCAAAGTGTGTTGGTTGATGG<br/> TGTCGAAAGAGATGGTTTGAACGATGCTTACGATGGTTTGGCT<br/> ATGGGTGTTACGCTGAAAAGTGTGCTAGAGATTGGGATATTA<br/> CTAGAGAACAACAAGACAACCTTCGCTATCGAATCCTACCAAAA</p>                                                                                                                                                                                                                                                                                                                                                                                                                                                                                                                                                                                                                                                                                                                                                                                                                                                                                                                                                                                                                                                                                                                                                                                                                                                                                                                                                               | <p><i>Saccharomyces cerevisiae</i></p> |

|               |                                                                                                                                                                                                                                                                                                                                                                                                                                                                                                                                                                                                                                                                                                                                                                                                                                                                                                                                                                                              |                                   |
|---------------|----------------------------------------------------------------------------------------------------------------------------------------------------------------------------------------------------------------------------------------------------------------------------------------------------------------------------------------------------------------------------------------------------------------------------------------------------------------------------------------------------------------------------------------------------------------------------------------------------------------------------------------------------------------------------------------------------------------------------------------------------------------------------------------------------------------------------------------------------------------------------------------------------------------------------------------------------------------------------------------------|-----------------------------------|
|               | <p>GTCTCAAAGTCTCAAAGGAAGGTAAGTTCGACAACGAAATT<br/> GTTCCAGTTACCATTAAGGGTTTTAGAGGTAAGCCAGATACTC<br/> AAGTCACCAAGGACGAAGAACCAGCTAGATTGCACGTTGAAAA<br/> GTTGAGATCTGCTAGAAGTGTTCCAAAGGAAAACGGTACT<br/> GTTACTGCTGCTAACGCTTCTCCAATCAACGATGGTGCTGCTG<br/> CTGTCATCTTGGTTTTCCGAAAAGGTTTTGAAGGAAAAGAAGTT<br/> GAAGCCATTGGCTATTATCAAGGGTTGGGGTGAAGCTGCTCAC<br/> CAACCAGCTGATTTACCTGGGCTCCATCTTTGGCTGTTCCAA<br/> AGGCTTTGAAGCACGCTGGTATCGAAGACATCAACTCTGTTGA<br/> TTACTTCGAATTCACGAAGCTTTCTCTGTTGTCGGTTTTGGTTA<br/> ACACTAAGATTTTGAAGTTGGACCCATCTAAGGTTAACGTTTAC<br/> GGTGGTGCTGTTGCTTTGGGTCACCCATTGGGTTGTTCTGGTG<br/> CTAGAGTTGTTGTTACCTTGTGTCATCTTGCAACAAGAAGGT<br/> GGTAAGATCGGTGTTGCTGCTATTTGTAACGGTGGTGGTGGTG<br/> CTTCCTCTATTGTCATTGAAAAGATTTAA</p>                                                                                                                                                                                                                                               |                                   |
| <i>optHbd</i> | <p>ATGAAGAAGTTTTGTGTTATTGGTGCTGGTACTATGGGTTCTG<br/> GTATTGCTCAAGCTTTGCTGCTAAGGGTTTCGAAGTTGTTTTG<br/> AGAGATATTAAGGATGAATTCGTTGATAGAGTTTTGGATTTTCA<br/> CAACAAGAAGTTGTCTAAGTTGGTTAAGAAGGGTAAGATTGAA<br/> GAAGCTACTAAGTTGAAATCTTGACTAGAATTTCCGGTACCG<br/> TTGACTTGAACATGGCTGCTGATTGTGATTTGGTTATTGAAGCT<br/> GCTGTTGAAAGAATGGATATTAAGAAGCAAATTTTCGCTGACTT<br/> GGACAACATTTGTAAGCCAGAAACCATTTTGGCTTCTAACACCT<br/> CTTCTTTGTCTATTACCGAAGTTGCTTCTGCTACTAAGAGGCCA<br/> GATAAGGTTATTGGTATGCACTTCTCAACCCAGCTCCAGTTAT<br/> GAAGTTGGTTGAAGTTATTAGAGGTTGCTACCTCTCAAGAAA<br/> CTTTGATGCTGTTAAGGAAACCTCTATTGCTATTGGTAAGGAT<br/> CCAGTTGAAGTTGCTGAAGCTCCAGGTTTCGTTGTTAACAGAA<br/> TTTTGATTCCAATGATTAACGAAGCTGTTGGTATTTTGGCTGAA<br/> GGTATTGCTTCTGTTGAAGACATTGATAAGGCTATGAAGTTGG<br/> GTGCTAACCAATGGGTCATTGGAATTGGGTGATTTTCA<br/> TGGTTTGGATATTTGTTTGGCTATTATGGATGTTTTGACTCTG<br/> AAACTGGTGATTCTAAGTACAGACCACACCTTGTGAAAGAA<br/> GTACGTTAGAGCTGGTTGGTTGGGTAGAAAGTCTGGTAAGGG<br/> TTTCTACGATTACTCTAAGTAA</p> | <i>Clostridium acetobutylicum</i> |
| <i>optCrt</i> | <p>ATGGAATTGAACAACGTCATCTTGAAAAGGAAGGTAAGGTTG<br/> CTGTTGTTACCATTAACAGACCAAAGGCTTTGAACGCTTTGAAC<br/> TCTGATACCTTGAAGGAAATGGATTACGTTATTGGTGAAATTGA<br/> AAACGATTCTGAAGTTTTGGCTGTTATTTGACTGGTGCTGGTG<br/> AAAAGTCTTTGCTGGTGCTGATATTTCTGAAATGAAGGAA<br/> ATGAACACCATTGAAGGTAGAAAGTTCGGTATTTTGGGTAACA<br/> AGGTTTTCAGAAGATTGAATTGTTGGAAAAGCCAGTTATTGCT<br/> GCTGTTAACGTTTTGCTTTGGGTGGTGGTTGTGAAATTGCTA<br/> TGTCTTGTGATATTAGAATTGCTTCTTCTAACGCTAGATTCCGT<br/> CAACCAGAAGTTGGTTTGGGTATTACCCAGGTTTCGGTGGTA<br/> CCCAAAGATTGTCTAGATTGGTTGGTATGGGTATGGCTAAGCA<br/> ATTGATTTTCACTGCTCAAACATTAAGGCTGATGAAGCTTTGA<br/> GAATCGGTTTGGTTAACAAGGTTGTTGAACCATCTGAATTGAT<br/> GAACACCGCTAAGGAAATTGCTAACAAGATTGTTTCTAACGCT<br/> CCAGTTGCTGTTAAGTTGTCTAAGCAAGCTATTAACAGAGGTAT</p>                                                                                                                                                                                                                               | <i>Clostridium acetobutylicum</i> |

|                      |                                                                                                                                                                                                                                                                                                                                                                                                                                                                                                                                                                                                                                                                                                                                                                                                                                                                                                                                                                                                                                                                                                                                                                                                                                                                                                                                                                                                                   |                                        |
|----------------------|-------------------------------------------------------------------------------------------------------------------------------------------------------------------------------------------------------------------------------------------------------------------------------------------------------------------------------------------------------------------------------------------------------------------------------------------------------------------------------------------------------------------------------------------------------------------------------------------------------------------------------------------------------------------------------------------------------------------------------------------------------------------------------------------------------------------------------------------------------------------------------------------------------------------------------------------------------------------------------------------------------------------------------------------------------------------------------------------------------------------------------------------------------------------------------------------------------------------------------------------------------------------------------------------------------------------------------------------------------------------------------------------------------------------|----------------------------------------|
|                      | <p>GCAATGTGATATTGATACTGCTTTGGCTTTTGAATCTGAAGCTT<br/> TCGGTGAATGTTTCTCTACCGAAGATCAAAAGGATGCTATGAC<br/> CGCTTTCATTGAAAAGAGAAAGATTGAAGGTTTCAAGAACAGA<br/> TAA</p>                                                                                                                                                                                                                                                                                                                                                                                                                                                                                                                                                                                                                                                                                                                                                                                                                                                                                                                                                                                                                                                                                                                                                                                                                                                    |                                        |
| <p><i>opt</i>Ter</p> | <p>ATGATTGTTAAGCCAATGGTTAGAAACAACATTTGTTTGAACGC<br/> TCACCCACAAGGTTGTAAGAAGGGTGTGAAGATCAAATTGAA<br/> TACACCAAGAAGAGAATTACCGCTGAAGTTAAGGCTGGTGCTA<br/> AGGCTCCAAAGAACGTTTTGGTTTTGGGTTGTTCTAACGGTTA<br/> CGGTTTGGCTTCTAGAATTACCGCTGCTTTCCGGTTACGGTGCT<br/> GCTACTATCGGTGTTTCCTTCGAAAAGGCTGGTTCTGAAACCA<br/> AGTACGGTACCCAGGTTGGTACAACAACCTTGGCTTTTCGACGA<br/> AGCTGCTAAGAGAGAAGGTTTGTACTCCGTTACTATTGACGGT<br/> GACGCTTTCTCCGATGAAATCAAGGCTCAAGTTATCGAAGAAG<br/> CTAAGAAGAAGGGTATTAAGTTCGATTTGATTGTTTACTCTTTG<br/> GCTTCTCCAGTTAGAACCGATCCAGACACCGGTATTATGCACA<br/> AGTCCGCTTTGAAGCCATTCGGTAAGACCTTCACCGGTAAGAC<br/> CGTCGATCCATTCACCGGTGAATTGAAGGAAATCTCCGCTGAA<br/> CCAGCTAACGATGAAGAAGCTGCTGCTACCGTTAAGGTTATGG<br/> GTGGTGAAGACTGGGAAAGATGGATTAAGCAATTGTCTAAGGA<br/> AGGTTTGTGGAAGAAGGTTGTATTACCTTGGCTTACTCCTACA<br/> TCGGTCCAGAAGCTACTCAAGCTTTGTACAGAAAGGGTACCAT<br/> TGGTAAGGCTAAGGAACACTTGAAGCTACTGCTCACAGATTG<br/> AACAAGGAAAACCCATCTATTAGAGCTTTTCGTTTCTGTTAACA<br/> GGGTTTGGTACCAGAGCTTCTGCTGTTATCCCAGTTATTCCAT<br/> TGTAATTGGCTTCCTTGTCAAGGTTATGAAGGAAAAGGGTAA<br/> CCACGAAGGTTGTATCGAACAAATTACCAGATTGTACGCTGAA<br/> AGATTGTACAGAAAGGACGGTACCATCCCAGTCGATGAAGAAA<br/> ACAGAATCAGAATCGACGACTGGGAATTGGAAGAAGACGTTCA<br/> AAAGGCTGTTTCTGCTTTGATGGAAAAGGTTACCGGTGAAAAC<br/> GCTGAATCTTTGACCGACTTGGCTGGTTACAGACACGACTTCT<br/> TGGCTTCTAACGGTTTCGATGTTGAAGGTATCAACTACGAAGC<br/> TGAAGTTGAAAGATTTCGACAGAATTTAA</p> | <p><i>Treponema<br/> denticola</i></p> |
